# Supplementary material for: A low-temperature ionic liquid system for topochemical synthesis of Si nanospheres for high-performance lithium-ion batteries
Source: Royal Society of Chemistry journal article supplement (doi:10.1039/d4dt03315a), 2025-01-01
Supplement: d4dt03315a1.pdf [file d4dt03315a1.pdf]

## Supporting Information

# A Low-temperature Ionic Liquid System to Topochemically Synthesize Si Nanospheres for High-performance Lithium-ion Batteries

Yanan Xu, Shiyue Zhang, Yu Zhang, Qing Hu, Hao Li, Wenkai Wang, and Hongbin Du\*

State Key Laboratory of Coordination Chemistry, School of Chemistry and Chemical Engineering, Nanjing University, Nanjing, 210023, China. E-mail: hbdu@nju.edu.cn

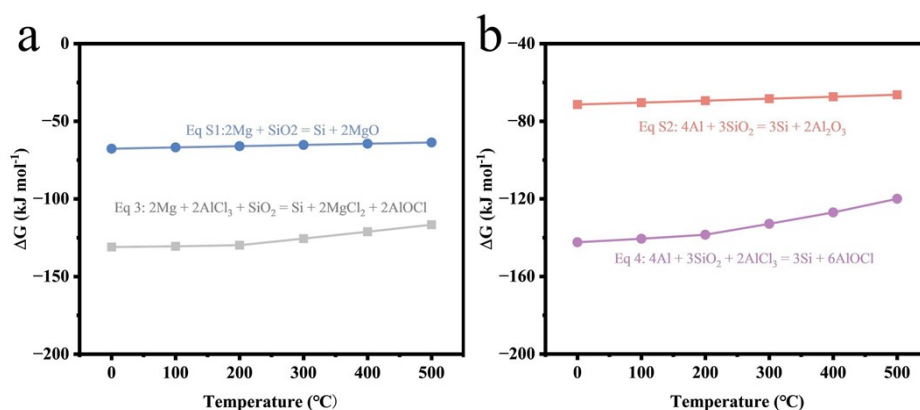

Figure S1. (a-b) The Gibbs free energy curve of the reaction during synthesis.

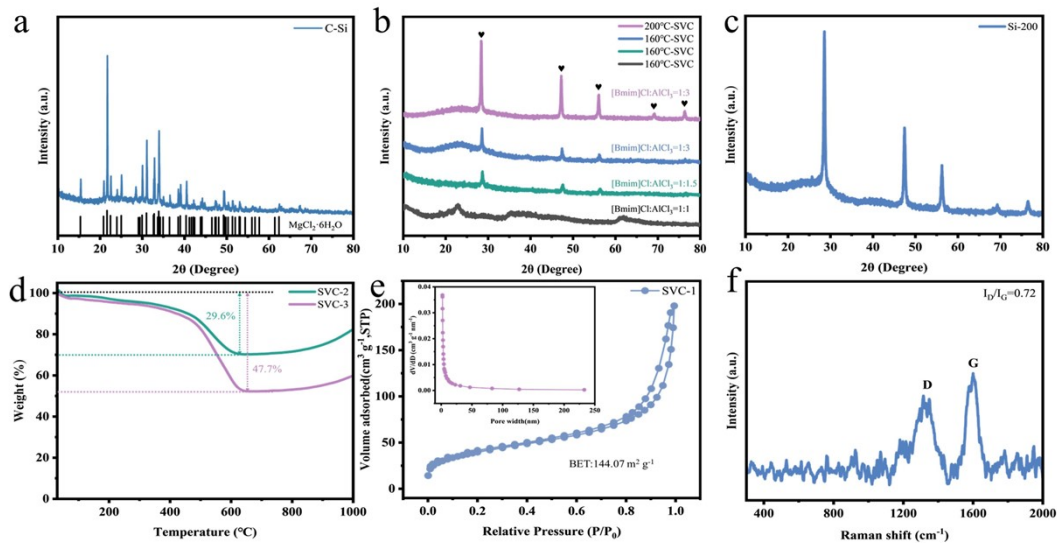

Figure S2. (a) XRD pattern of the crude products after  $\text{SiO}_2@\text{C}$  was reduced. (b) XRD patterns of SVC-1 obtained at 200°C, 160°C, [Bmim]Cl:  $\text{AlCl}_3$  ratio of 1:1, and 1:1.5, respectively. (c) XRD pattern of Si obtained using  $\text{AlCl}_3$  as solvent (200 °C). (d) TGA curves of SVC-2 and SVC-3 (e)  $\text{N}_2$  adsorption/desorption isotherms of SVC-1 with inset displaying pore distribution. (f) Raman spectrum of  $\text{SiO}_2@\text{C}$ .

We carried out experiments using  $\text{AlCl}_3$  as a solvent (without ionic liquid). According to the experimental results, although Si material is also prepared, the reaction temperature must exceed the melting point (194 °C) to form a solution system. Compared with pure  $\text{AlCl}_3$  as the reaction medium, the [Bmim]Cl- $\text{AlCl}_3$  reaction system is liquid at room temperature, which can disperse the precursor better and has a wider reaction temperature range.

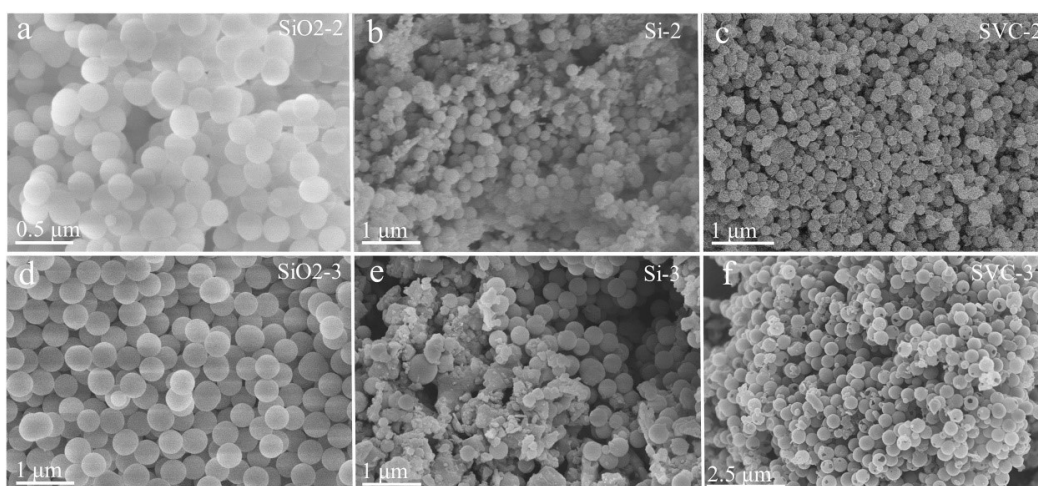

Figure S3. (a-c) SEM images of  $\text{SiO}_2\text{-2}$ ,  $\text{Si-2}$ , and  $\text{SVC-2}$ . (d-f) SEM images of  $\text{SiO}_2\text{-3}$ ,  $\text{Si-3}$ ,  $\text{SVC-3}$ .

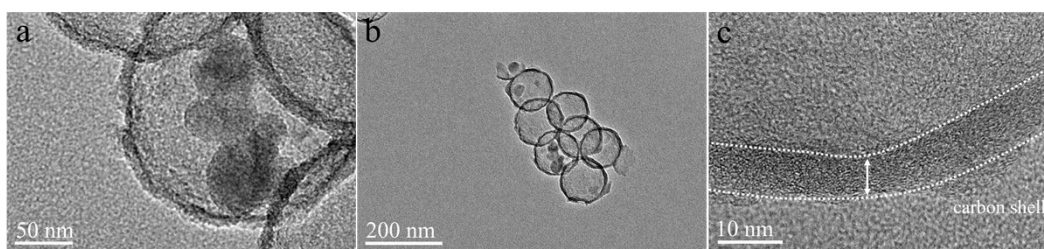

Figure S4. (a-b) TEM image of SVC-1. (c) HRTEM image of SVC-1.

As shown in Figure S4c, the carbon shell of SVC-1 shows an amorphous lattice, which is consistent with the results of XRD result in Figure S2a, indicating that the carbon in SVC-1 exists in an amorphous state.

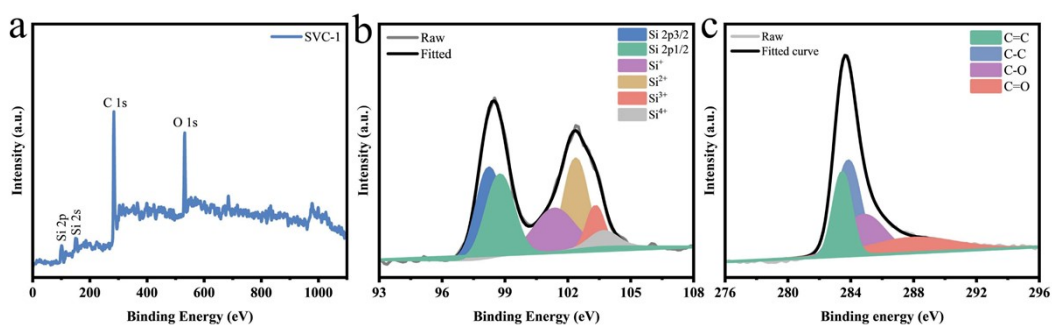

Figure S5. (a) XPS survey spectrum of SVC-1. (b-c) High-resolution XPS fitting results of Si 2p and C 1s.

The high-resolution spectrum of Si reveals six characteristic peaks, confirming the existence of Si 2p<sub>3/2</sub> (98.3 eV), Si 2p<sub>1/2</sub> (98.8 eV), Si<sup>+</sup> (101.4 eV), Si<sup>2+</sup> (102.4 eV), Si<sup>3+</sup> (103.3 eV), and Si<sup>4+</sup> (103.9 eV).

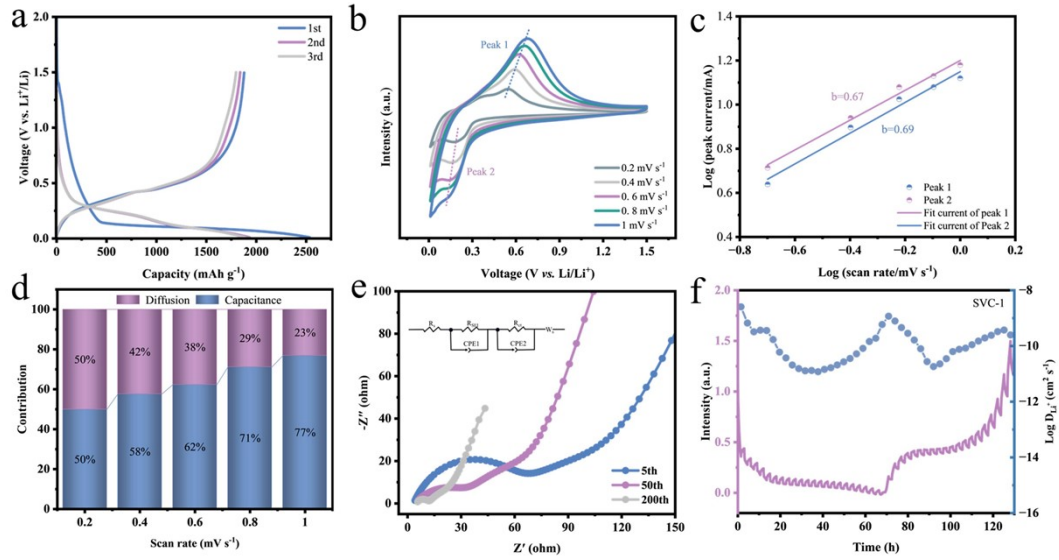

Figure S6. (a) The capacity-voltage curves of SVC-1. (b) CV curves of ns-Si at different scan rates and (c) the corresponding log ( $i$ ) versus log ( $v$ ) plots. (d) Capacity contribution of ns-Si for pseudo-capacitance control and diffusion control at different scan rates. (e) Equivalent circuits and EIS curves of ns-Si after the 5th, 50th, and 200th cycles. (f) GITT curve of SVC-1.

**Table S1.** A summary of the performances of reported Si electrodes

| Materials           | Preparative Method         | ICE   | Current density       | Cycles | Capacity after cycles (mA h g <sup>-1</sup> ) | Capacity retention | Reference               |
|---------------------|----------------------------|-------|-----------------------|--------|-----------------------------------------------|--------------------|-------------------------|
| Si/SiOx             | Magnesiothermic reduction  | 68%   | 0.2 A g <sup>-1</sup> | 100    | 1400                                          | 98%                | 1                       |
| Si@SiO <sub>2</sub> | Magnesiothermic reduction  | 63.8% | 0.36A g <sup>-1</sup> | 100    | 1470                                          | 82.5%              | 2                       |
| Si-200              | MgH <sub>2</sub> reduction | 85.7% | 2 A g <sup>-1</sup>   | 500    | 854                                           | <30.0%             | 3                       |
| p-SiNPs@HC-1        | Magnesiothermic reduction  | 55%   | 0.2 A g <sup>-1</sup> | 100    | 1436                                          | 83.0%              | 4                       |
| Si/C/Si/C           | Aluminothermic reduction   | 83.1% | 1 A g <sup>-1</sup>   | 200    | 1673                                          | 86.9%              | 5                       |
| Nano-Si             | Aluminothermic reduction   | 81.7% | 0.5 A g <sup>-1</sup> | 500    | 2663                                          | <80%               | 6                       |
| 3-D Si              | Magnesiothermic reduction  | 74%   | 0.4 A g <sup>-1</sup> | 400    | 1287                                          | 52%                | 7                       |
| Si/C                | Mg/Al reduction            | 65%   | 0.2 A g <sup>-1</sup> | 100    | 600                                           | 71.3%              | 8                       |
| Si/SiC/C            | Magnesiothermic reduction  | 79.1% | 0.1 A g <sup>-1</sup> | 200    | 13290                                         | 87.8%              | 9                       |
| Hierarchical Si     | Magnesiothermic reduction  | xxx   | 1 A g <sup>-1</sup>   | 100    | 500                                           | 75%                | 10                      |
| HPS-Si              | Magnesiothermic reduction  | 62.7% | 0.2 A g <sup>-1</sup> | 100    | 1272.8                                        | xxx                | 11                      |
| Si/C                | Magnesiothermic reduction  | 73.2% | 0.2 A g <sup>-1</sup> | 100    | 1449.2                                        | 98%                | 12                      |
| Si@C                | Magnesiothermic reduction  | <54%  | 0.1 A g <sup>-1</sup> | 100    | 1546                                          | <99%               | 13                      |
| SiOC-H.             | Magnesiothermic reduction  | 70%   | 2 A g <sup>-1</sup>   | 400    | <600                                          | <50%               | 14                      |
| Nano-Si             | Magnesiothermic reduction  | 82.9% | 0.5 A g <sup>-1</sup> | 100    | 2021.2                                        | 92.4%              | <b><i>This work</i></b> |
| SVC-1               | Magnesiothermic reduction  | 74.1% | 0.5 A g <sup>-1</sup> | 100    | 1454.7                                        | 100%               | <b><i>This work</i></b> |
|                     |                            |       | 2 A g <sup>-1</sup>   | 600    | 913.7                                         | 73.9%              | <b><i>This work</i></b> |

Table S2. EIS fitting parameters of commercial ns-Si and SVC-1 before cycling.

| Sample | $R_s(\Omega)$ | $R_{ct} (\Omega)$ |
|--------|---------------|-------------------|
| ns-Si  | 3.1           | 131.6             |
| SVC-1  | 2.6           | 121.1             |

Table S3. EIS fitting parameters of SVC-1 at 5th, 50th, and 200th.

| Sample | $R_s(\Omega)$ | $R_{SEI}$ | $R_{ct} (\Omega)$ |
|--------|---------------|-----------|-------------------|
| 5th    | 3.4           | 59.9      | 52.9              |
| 50th   | 4.2           | 33.3      | 33.6              |
| 200th  | 4.9           | 7.2       | 12.9              |

## References

- 1 K. Zeng, T. Li, X. Y. Qin, G. M. Liang, L. H. Zhang, Q. Liu, B. H. Li and F. Y. Kang, *Nano Res*, 2020, **13**, 2987-2993.
- 2 J. W. Liang, X. N. Li, Z. G. Hou, W. Q. Zhang, Y. C. Zhu and Y. T. Qian, *ACS Nano*, 2016, **10**, 2295-2304.
- 3 J. G. Yu, K. Wang, W. L. Song, H. Huang, C. Liang, Y. Xia, J. Zhang, Y. P. Gan, F. Wang and W. K. Zhang, *Chem. Eng. J.* 2021, **406**, 126805.
- 4 S. C. Guo, X. Hu, Y. Hou and Z. H. Wen, *ACS Appl. Mater. Interfaces*, 2017, **9**, 2084-42092.
- 5 H. M. Wu, P. B. Gao, J. I. Mu, Z. C. Miao, P. F. Zhou, T. Zhou and J. Zhou, *Chinese Chem. Lett*, 2022, **33**, 3236-3240.
- 6 N. Lin, Y. Han, J. Zhou, K. Zhang, T. Xu, Y. Zhu and Y. Qian, *Energy Environ Sci*, 2015, **8**, 3187-3191.
- 7 A. Ansari Hamedani, C. W. Ow-Yang and S. Hayat Soytaş, *ChemElectroChem*, 2021, **8**, 3181-3191.
- 8 M. K. Majeed, A. Saleem, C. S. Wang, C. H. Song and J. Yang, *Chem-eur J*, 2020, **26**, 10544-10549.

- 9 X. H. Huang, R. Q. Guo, Y. Lin, Y. Q. Cao and J. B. Wu, *J Energy Storage*, 2024, **87**, 111374.
- 10 J. K. Yoo, J. Kim, M. J. Choi, Y. U. Park, J. Hong, K. M. Baek, K. Kang and Y. S. Jung, *Adv Energy Mater*, 2014, **4**, 1400622.
- 11 F. Di, Z. X. Wang, C. Ge, L. X. Li, X. Geng, C. G. Sun, H. M. Yang, W. M. Zhou, D. Y. Ju, B. G. An and F. Li, *Journal of Materials Science & Technology*, 2023, **157**, 1-10.
- 12 X. J. Lin, A. Li, D. Li, H. H. Song and X. H. Chen, *ACS Applied Materials & Interfaces*, 2020, **12**, 15202-15210.
- 13 Q. Liu, Y. X. Ji, X. M. Yin, J. W. Li, Y. J. Liu, X. Hu and Z. H. Wen, *Energy Storage Mater*, 2022, **46**, 384-393.
- 14 S. J. Yeom, T.-U. Wi, S.-J. Jung, M. S. Kim, S.-C. Jeon and H.-W. Lee, *Chem Commun*, 2023, **59**, 11963-11966.
